# Supplementary material
Source: publisher figshare collection journal article supplement (https://sage.figshare.com/ndownloader/files/21599568)
Supplement: Supplementary file 1 [file 21599568]

**Table S2**. Principal components analysis, 1937-1997, summary of standard riparian tree-ring chronologies. Table entries after 3-letter site codes are loading of the 5 principal components. Percentage variance explained by each PC listed in last row.

| Sitea | PC1 | PC2 | PC3 | PC4 | PC5 |
| --- | --- | --- | --- | --- | --- |
| SPS  OLA  SBA  OBE  SBG | 0.402  0.478  0.575  0.222  0.480 | 0.322  -0.382  0.005  -0.742  0.446 | -0.820  0.282  0.250  -0.341  0.264 | -0.245  -0.707  0.263  0.483  0.371 | -0.049  0.214  -0.733  0.226  0.603 |
| %Var | 43.9 | 24.5 | 14.5 | 9.8 | 7.2 |

aOrdered as in Table 1; codes beginning with "S" are *Salix*, and others are *Populus.*
